# Supplementary material
Source: PubMed Central journal article supplement (PMC6367625)
Supplement: tpmd180529.SD1.pdf [file tpmd180529.SD1.pdf]

**Supplementary Material**

S1 Figure: Flowchart of facility and patients surveyed and sampled

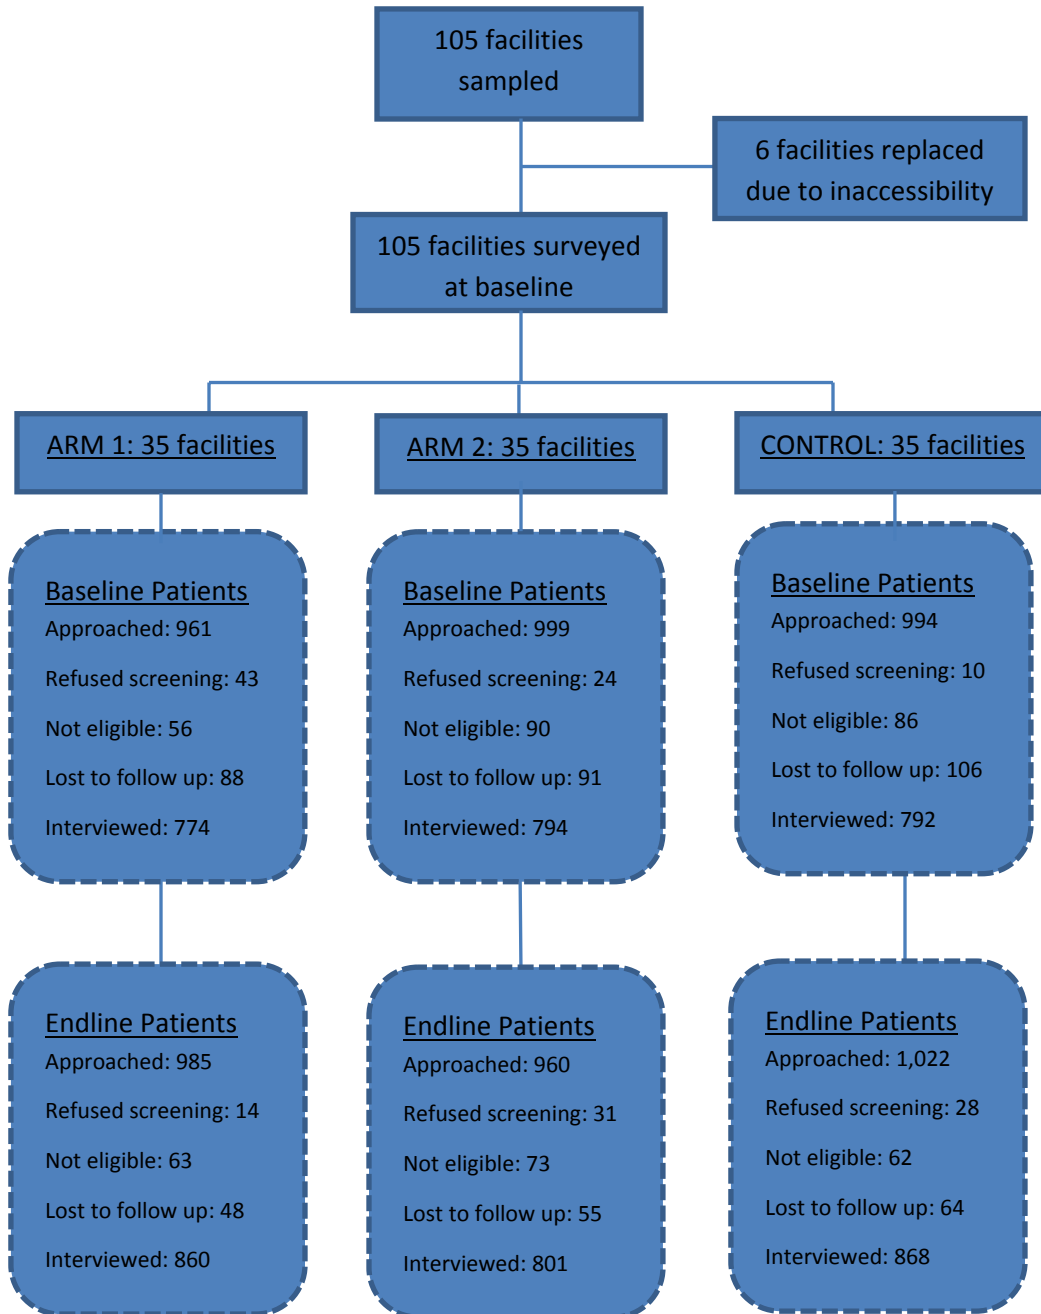

Notes: Randomization took place after baseline data collection. Lost to follow up indicates the patient was eligible and consented but survey staff did not have a chance to interview them before they left the facility.

S1 Table: Malaria, pneumonia, and diarrhea case management results from analysis of a per-protocol population\*

|                                                                                  | Baseline          |                   |                   | Endline           |                   |                   | Effect size (difference in differences) |         |                                |         |
|----------------------------------------------------------------------------------|-------------------|-------------------|-------------------|-------------------|-------------------|-------------------|-----------------------------------------|---------|--------------------------------|---------|
|                                                                                  | Arm 1             | Arm 2             | Control           | Arm 1             | Arm 2             | Control           | Arm 1,<br>% change<br>(95% CI)          | p-value | Arm 2,<br>% change<br>(95% CI) | p-value |
| <b>Primary outcome: Correct case management of suspect uncomplicated malaria</b> |                   |                   |                   |                   |                   |                   |                                         |         |                                |         |
| Overall correct malaria case management*                                         | 102/273<br>(34.9) | 116/319<br>(33.9) | 225/559<br>(42.8) | 106/201<br>(55.1) | 148/273<br>(51.8) | 285/540<br>(59.6) | 3.4<br>(-15.8, 22.5)                    | 0.730   | 1.1<br>(-19.1, 21.2)           | 0.919   |
| <b>Secondary outcomes: Malaria</b>                                               |                   |                   |                   |                   |                   |                   |                                         |         |                                |         |
| 1. RDT/BS performed                                                              | 165/200<br>(82.5) | 217/238<br>(92.3) | 384/490<br>(79.6) | 120/159<br>(74.5) | 205/243<br>(87.1) | 410/522<br>(78.1) | -6.5<br>(-19.2, 6.4)                    | 0.326   | -3.7<br>(-13.4, 6.0)           | 0.454   |
| 2. First-line AM*                                                                | 136/158<br>(88.8) | 156/192<br>(82.4) | 238/272<br>(88.5) | 72/84<br>(86.6)   | 95/103<br>(91.5)  | 177/190<br>(94.0) | -7.6<br>(-24.8, 9.7)                    | 0.391   | 3.7<br>(-15.4, 22.8)           | 0.706   |
| 3. If AL, correct dose                                                           | 117/142<br>(84.6) | 141/148<br>(97.2) | 210/265<br>(82.3) | 43/45<br>(95.7)   | 76/78<br>(98.7)   | 136/139<br>(98.3) | -4.9<br>(-29.2, 19.3)                   | 0.691   | -14.5<br>(-30.1, 1.2)          | 0.068   |
| 4. If AL, tablets dispensed                                                      | 122/125<br>(97.9) | 145/148<br>(99.3) | 214/222<br>(97.2) | 45/46<br>(97.7)   | 76/89<br>(84.4)   | 135/136<br>(99.8) | -2.8<br>(-9.9, 4.2)                     | 0.431   | -17.5<br>(-33.8, 11.3)         | 0.035   |
| 5. First dose AL given                                                           | 17/122<br>(12.9)  | 9/145<br>(5.5)    | 39/213<br>(27.8)  | 2/45<br>(3.3)     | 20/76<br>(28.4)   | 15/135<br>(12.6)  | 5.6<br>(-28.6, 39.9)                    | 0.744   | 38.1<br>(0.9, 75.5)            | 0.045   |
| 6. If AL, patient knows dose                                                     | 85/122<br>(71.2)  | 103/145<br>(69.2) | 173/214<br>(86.0) | 39/45<br>(85.7)   | 60/76<br>(79.3)   | 99/135<br>(77.7)  | 22.8<br>(9.4, 36.2)                     | 0.001   | 18.4<br>(2.8, 33.9)            | 0.021   |
| 7. If AL, patient told to complete                                               | 77/122<br>(65.2)  | 77/146<br>(54.0)  | 119/214<br>(60.1) | 21/45<br>(44.6)   | 45/76<br>(62.9)   | 71/135<br>(53.7)  | -14.2<br>(-36.0, 7.8)                   | 0.208   | 15.3<br>(-4.6, 35.5)           | 0.132   |
| 8. IF RDT neg, no AM                                                             | 75/81<br>(92.5)   | 103/106<br>(99.1) | 168/181<br>(95.9) | 78/78<br>(99.7)   | 131/132<br>(99.5) | 232/238<br>(98.4) | 4.6<br>N/A                              | N/A     | -2.1<br>N/A                    | N/A     |
| 9. Correct treatment severe malaria                                              | 1/15<br>(4.0)     | 1/14<br>(3.9)     | 0/32<br>(0.0)     | 0/5<br>(0.0)      | 0/6<br>(0.0)      | 0/6<br>(0.0)      | -4.0<br>N/A                             | N/A     | -3.9<br>N/A                    | N/A     |
| <b>Secondary outcomes: Pneumonia and Diarrhea</b>                                |                   |                   |                   |                   |                   |                   |                                         |         |                                |         |

|                                                                                   |                 |                 |                 |                 |                 |                 |                       |       |                        |       |
|-----------------------------------------------------------------------------------|-----------------|-----------------|-----------------|-----------------|-----------------|-----------------|-----------------------|-------|------------------------|-------|
| 1. HW measured respiratory rate if child had cough/difficult breathing            | 3/62<br>(4.8)   | 3/80<br>(3.0)   | 0/120<br>(0.0)  | 0/53<br>(0.0)   | 0/69<br>(0.0)   | 5/161<br>(1.9)  | -6.7<br>N/A           | N/A   | -4.9<br>N/A            | N/A   |
| 2. Prescription of first-line antibiotic for children with pneumonia <sup>†</sup> | 13/23<br>(50.4) | 23/35<br>(65.3) | 29/42<br>(59.0) | 18/26<br>(69.8) | 27/36<br>(73.4) | 48/68<br>(73.0) | 5.4<br>(-35.8, 46.8)  | 0.795 | -5.9<br>(-46.0, 34.2)  | 0.774 |
| 3. First dose of antibiotic given at facility                                     | 1/13<br>(5.0)   | 0/23<br>(0.0)   | 1/29<br>(4.4)   | 0/18<br>(0.0)   | 1/27<br>(4.6)   | 1/48<br>(0.7)   | -1.3<br>N/A           | N/A   | 8.3<br>N/A             | N/A   |
| 4. Prescription of ORS to children with diarrhea <sup>**</sup>                    | 30/48<br>(55.4) | 47/63<br>(75.1) | 48/81<br>(58.6) | 9/18<br>(45.3)  | 13/24<br>(59.5) | 39/69<br>(55.7) | -7.2<br>(-35.0, 20.5) | 0.608 | -12.7<br>(-44.9, 19.3) | 0.434 |

Note: Artemether-lumefantrine (AL)-related indicators for patients with suspected malaria. Suspect uncomplicated malaria: 72% at baseline and 60% at endline. Test positivity rate (facility malaria test): 47.5% at baseline and 35.1% at endline. 90% patients attended facilities with AL in stock at baseline, 84% at endline.

‡ All application case management actions done for patient with suspected uncomplicated malaria (Box 2).

\* Among patients testing positive at facility for malaria or suspect malaria cases not tested at facilities unable to test

† Among children with clinically-diagnosed pneumonia, according to re-examination during exit interviews.

\*\* An alternative definition definition for correct diarrhea treatment including both ORS and zinc was used, but was lower overall: 38.2% and 35.0% at endline, with no significant differences by arm. This indicator was not used for diarrhea case management as zinc stocks were not systematically measured during the survey.

\* Per-protocol population includes only those patients in arms 1 and 2 at endline treated by health workers who reported receiving SMS. Baseline observations include all patients at facilities in arm 3 and facilities in arms 1 and 2 where at least one health worker at endline reported receiving SMS.

S2 Table: Mean scores (out of 9) on clinical case scenarios, by study arm and time point

|             | Study Arm        |                                        |         | P-value |
|-------------|------------------|----------------------------------------|---------|---------|
|             | Malaria-<br>only | Malaria,<br>pneumonia,<br>and diarrhea | Control |         |
| Baseline    | 6.51             | 6.46                                   | 6.00    | 0.163   |
| Endline     | 6.47             | 6.30                                   | 6.40    | 0.836   |
| Endline PP* | 6.88             | 6.45                                   | 6.40    | 0.450   |

\* HWs who reported receiving messages
